# Supplementary material
Source: PubMed Central journal article supplement (PMC2889119)
Supplement: 1004618107_pnas.201004618SI.pdf [file 1004618107_pnas.201004618SI.pdf]

# Supporting Information

Mercer et al. 10.1073/pnas.1004618107

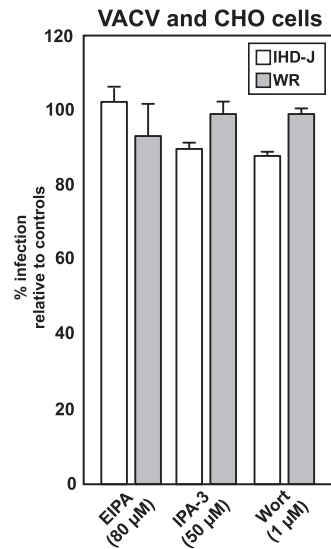

**Fig. S1.** Vaccinia virus entry into CHO cells does not involve macropinocytosis. CHO cells were treated with the maximum inhibitory concentrations of EIPA, IPA-3, and wortmannin (Wort) determined in HeLa cells. Cells were infected with International Health Department-J (IHD-J)- or Western reserve (WR)-EGFP-MVs and infection analyzed 4 h after infection. Experiments were performed in triplicate and average results displayed SE.

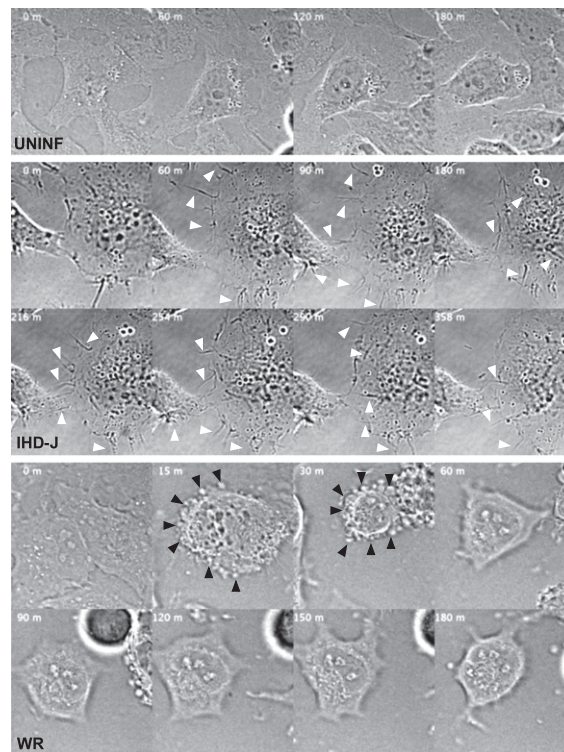

**Fig. S2.** The kinetics of IHD-J filopodia formation and WR bleb induction differ. In uninfected cells (UNINF) no filopodia or blebs are seen. The induction of filopodia by IHD-J MVs (IHD-J) lasts for several hours, with continuous extension and retraction of filopodia. Blebbing induced by WR MVs (WR) is a transient event lasting for ~30 min. Images are inverted for better visualization of filopodia and blebs. Filopodia are highlighted by white arrowheads and blebs by black arrowheads.

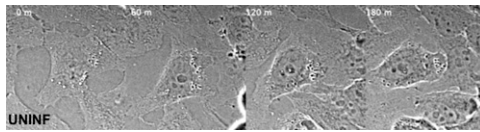

**Movie S1.** Uninfected HeLa cells do not undergo cell wide membrane blebbing or filopodia formation. HeLa cells were left untreated for 30 min at 25 °C. Cells were then shifted to 37 °C and imaged for 180 min.

[Movie S1](#)

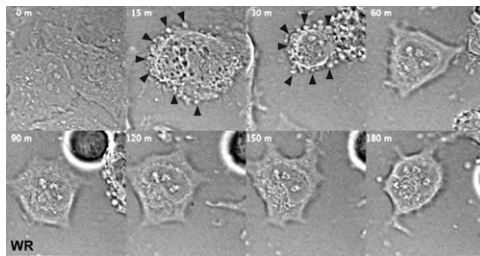

**Movie S2.** WR MV-induced blebbing is transient. HeLa cells were bound with WR MV's for 30 min at 25 °C. Cells were then shifted to 37 °C and imaged for 180 min. WR MV induced blebbing is a transient event beginning around 15 min after infection and lasting until ~60 min after infection.

[Movie S2](#)

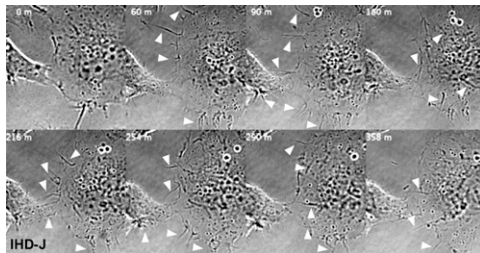

**Movie S3.** IHD-J MV-induced filopodia formation is permanent. HeLa cells were bound with IHD-J MVs for 30 min at 25 °C. Cells were then shifted to 37 °C and imaged for 360 min. IHD-J MV induced filopodia formation is long-lived, lasting for the full 360-min duration of the experiment.

[Movie S3](#)
